# Supplementary material for: Magnetic-controlled dandelion-like nanocatalytic swarm for targeted biofilm elimination
Source: Royal Society of Chemistry journal article supplement (doi:10.1039/d2nr00765g), 2022-01-01
Supplement: d2nr00765g1.pdf [file d2nr00765g1.pdf]

## Supporting Information

### **Magnetic-controlled dandelion-like nanocatalytic swarm for targeted biofilm elimination**

*Yanjie Huang*#, *Dong Liu*#, *Ruirui Guo*, *Bin Wang*, *Zhengzuo Liu*, *Yijia Guo*, *Jian Dong*\*,  
*Yuan Lu*\*

Yanjie Huang, Ruirui Guo, Prof. Jian Dong

Tianjin Industrial Microbiology Key Laboratory, College of Biotechnology, Tianjin  
University of Science and Technology, Tianjin 300457, China

Dong Liu, Bin Wang, Zhengzuo Liu, Yijia Guo, Prof. Yuan Lu

Key Laboratory of Industrial Biocatalysis, Ministry of Education, Department of  
Chemical Engineering, Tsinghua University, Beijing 100084, China.

\*Corresponding authors. Email: yuanlu@tsinghua.edu.cn (Y. Lu),

dongjian@tust.edu.cn (J. Dong)

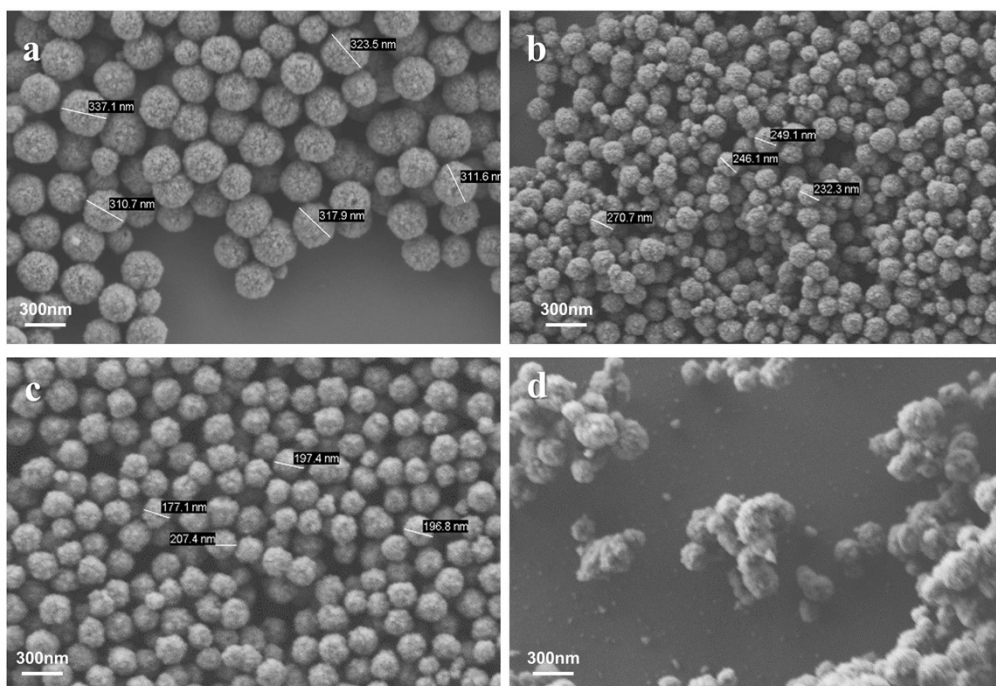

**Figure S1.** SEM images of the  $\text{Fe}_3\text{O}_4$  magnetite particles prepared by the solvothermal reaction with 0.3 g of  $\text{Na}_3\text{Cit}$ , 6.0 g of  $\text{NaAc}$  and different  $\text{FeCl}_3 \cdot 6\text{H}_2\text{O}$  concentration of a) 2.2 g, b) 3.25 g, c) 5 g, d) 7 g in 100 mL of ethylene glycol at 200 °C for 10 h.

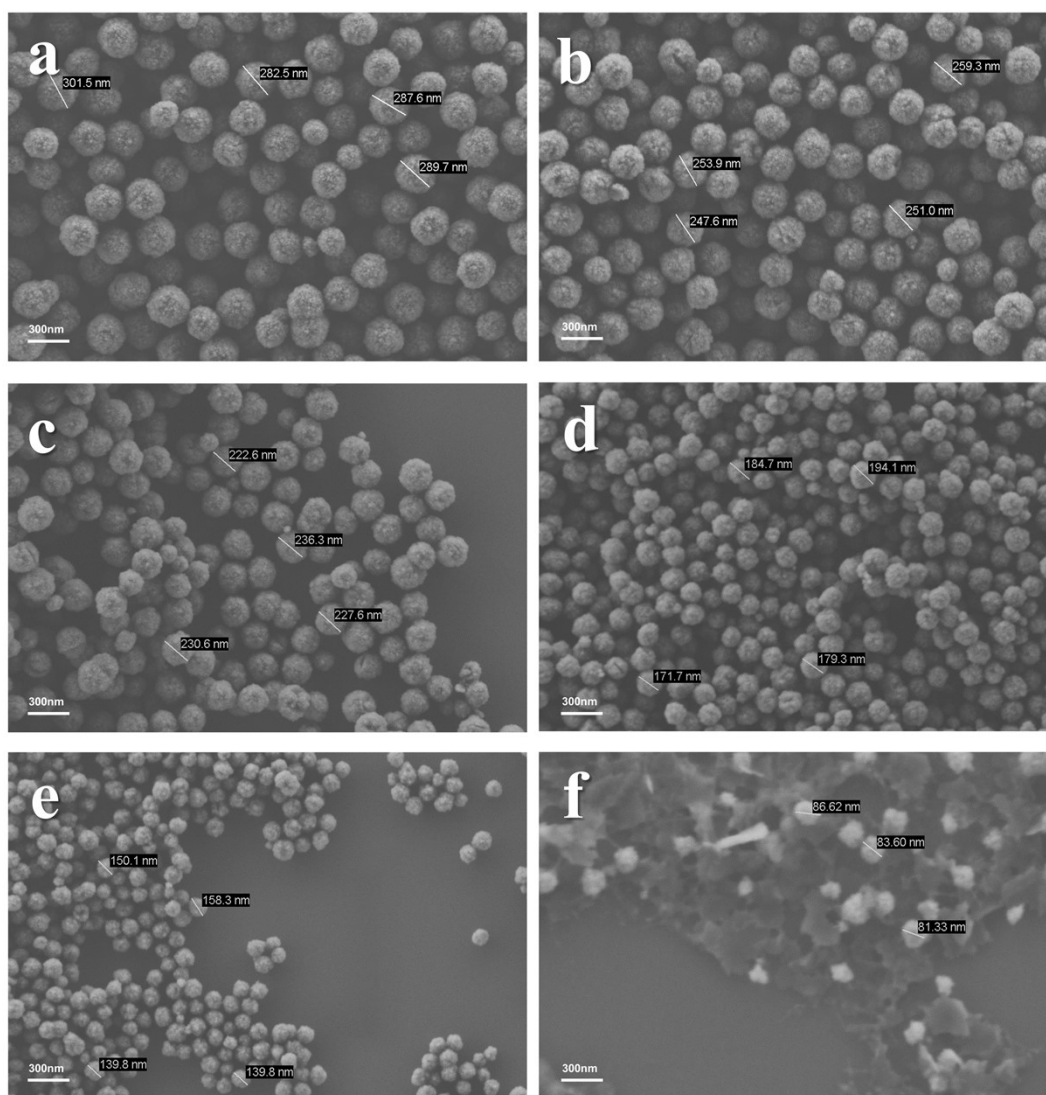

**Figure S2.** SEM images of the Fe<sub>3</sub>O<sub>4</sub> magnetite particles prepared by the solvothermal reaction with 3.25 g of FeCl<sub>3</sub>•6H<sub>2</sub>O, 6.0g of NaAc and different Na<sub>3</sub>Cit concentration of a) 0.05 g, b) 0.25 g, c) 0.5 g, d) 0.75 g, e) 1.0 g, f) 1.5 g in 100 mL of ethylene glycol at 200 °C for 10 h. With the increase of Na<sub>3</sub>Cit mass, the diameter of Fe<sub>3</sub>O<sub>4</sub> decreases.

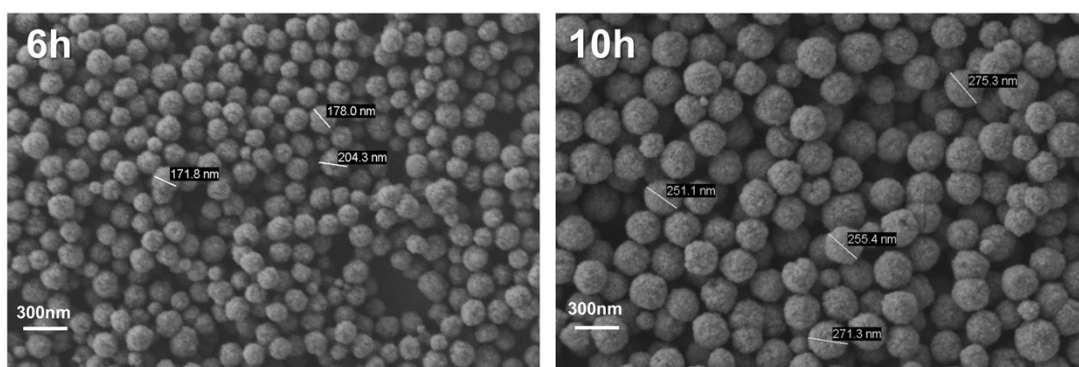

**Figure S3.** SEM images of the Fe<sub>3</sub>O<sub>4</sub> magnetite particles prepared by the solvothermal reaction with 3.25 g of FeCl<sub>3</sub>•6H<sub>2</sub>O, 0.30 g of Na<sub>3</sub>Cit and 6.0 g of NaAc in 100 mL of ethylene glycol at 200 °C for different reaction time

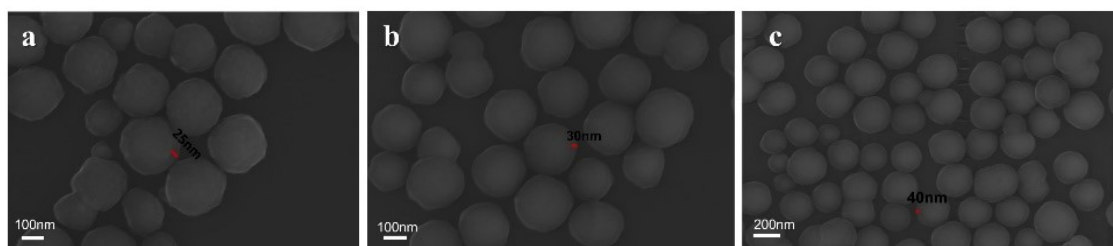

**Figure S4.**  $\text{Fe}_3\text{O}_4@n\text{SiO}_2$  SEM images with different thicknesses were prepared by adjusting the amount of TEOS.

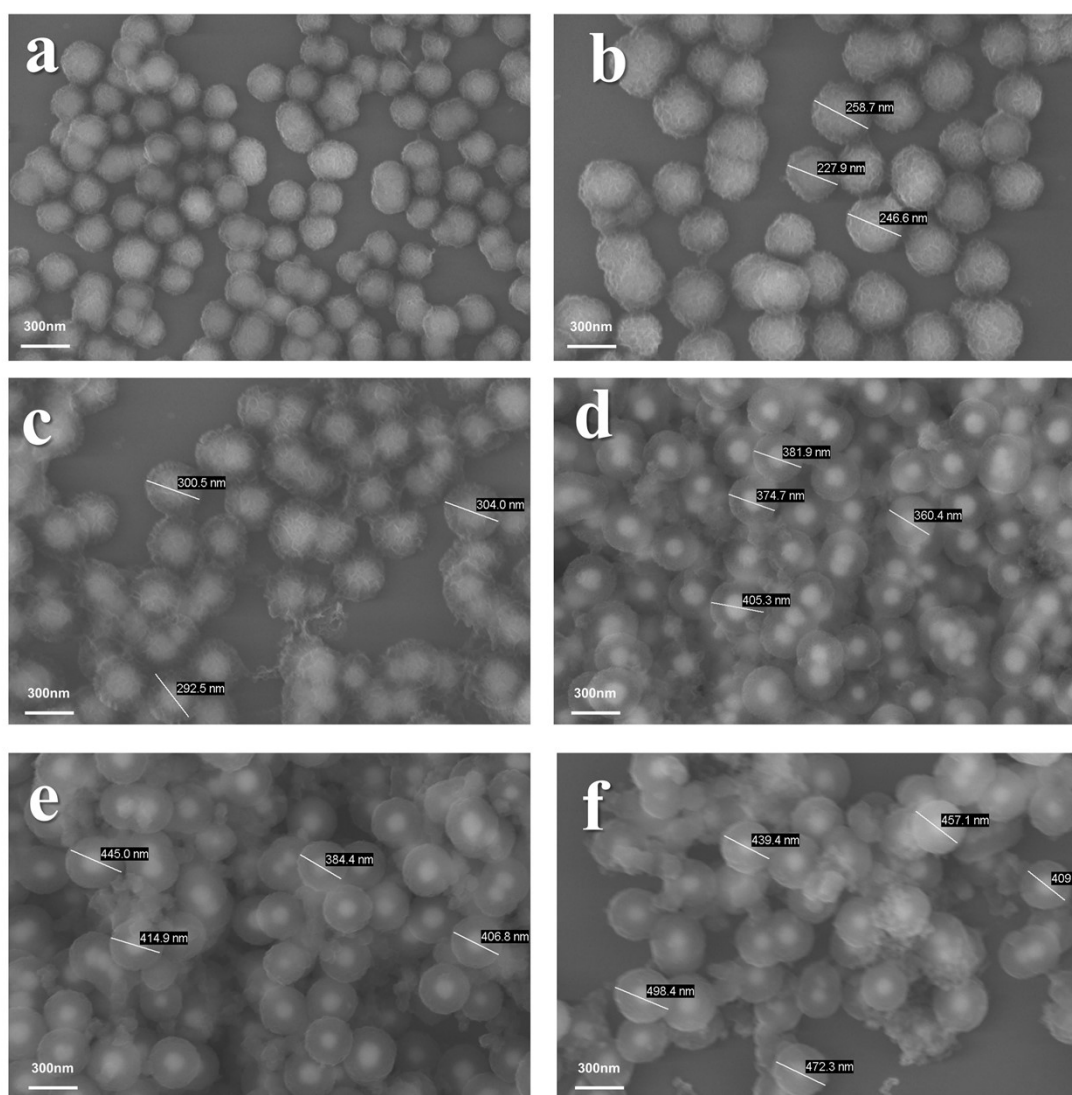

**Figure S5.** Morphological changes of FSDMS NPs at different reaction time a) 0 min, b) 5 min, c) 10 min, d) 20 min, e) 30 min, f) 45 min. A large number of secondary particles are formed after a long-time reaction.

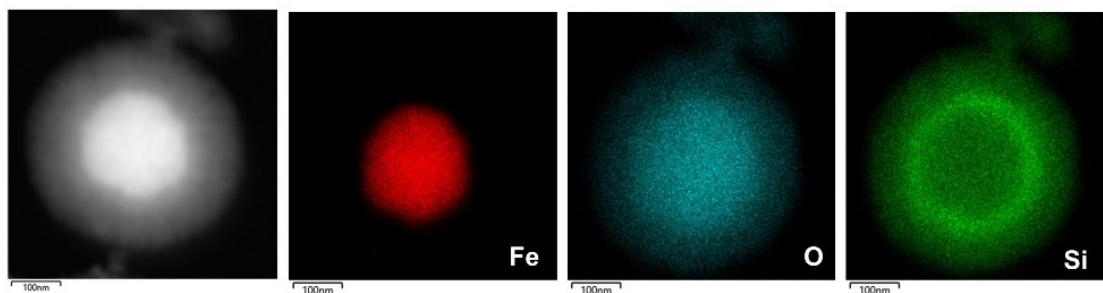

**Figure S6.** Element mapping image of FSDMS NPs. (Fe, O, Si) The center is composed of  $\text{Fe}_3\text{O}_4$ , and the outermost layer is free of  $\text{Fe}_3\text{O}_4$ , proving that there is no  $\text{Fe}_3\text{O}_4$  load.

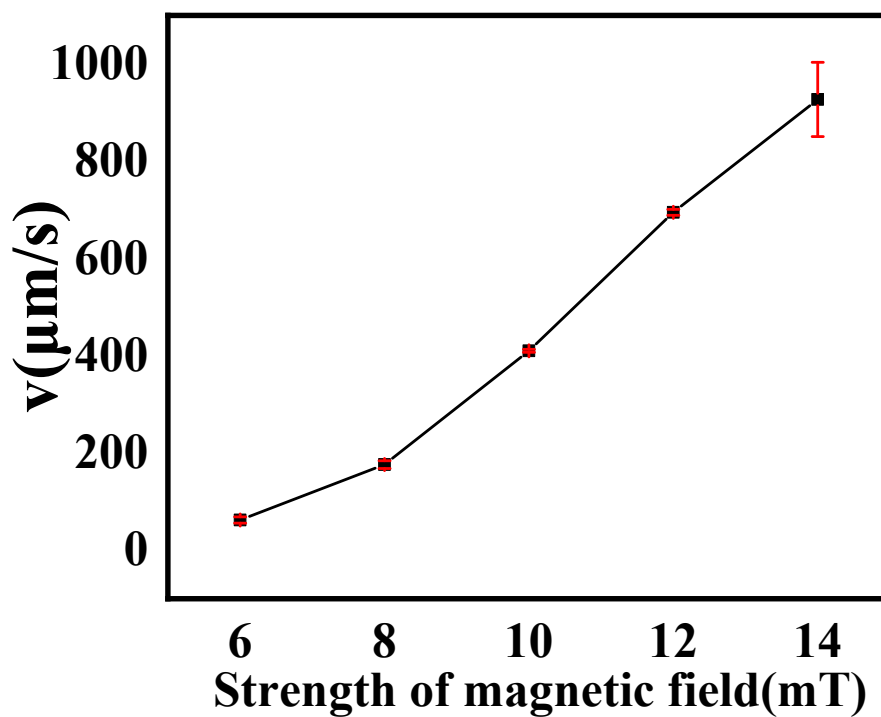

**Figure S7.** The effect of changing the magnetic field strength on the motion velocity of FSDMSsF NPs swarm: the velocity of the swarm increases with the increase of magnetic field intensity.



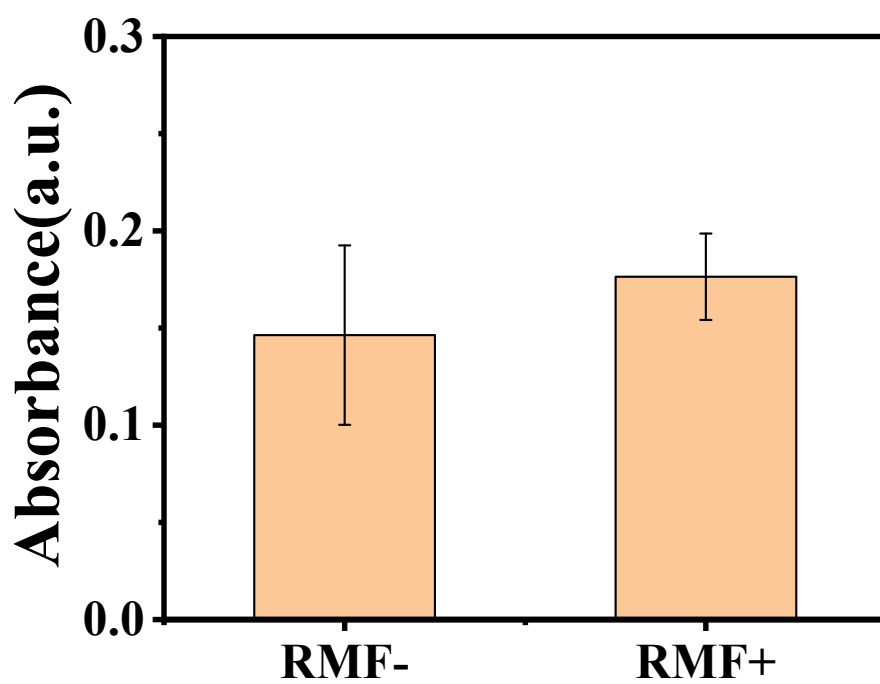

**Figure S8.** The absorbance of TMB oxidation catalyzed by FSDMSsF NPs with or without rotating magnetic field. ( $\text{H}_2\text{O}_2$  10 mM, TMB 10 mg/mL, FSDMSsF NPs 200  $\mu\text{g/mL}$ )

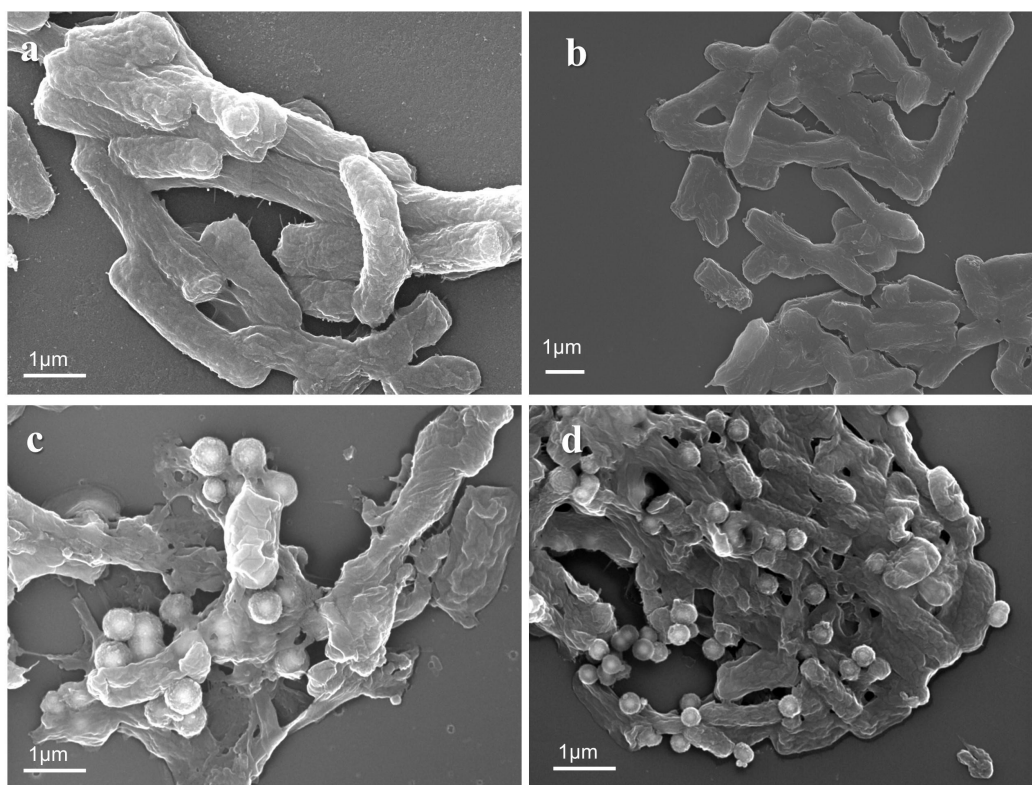

**Figure S9.** *E. coli* SEM images after magnetic field treatment: a) PBS, b)  $H_2O_2$ , c) FSDMSsF NPs, d) FSDMSsF NPs +  $H_2O_2$ .

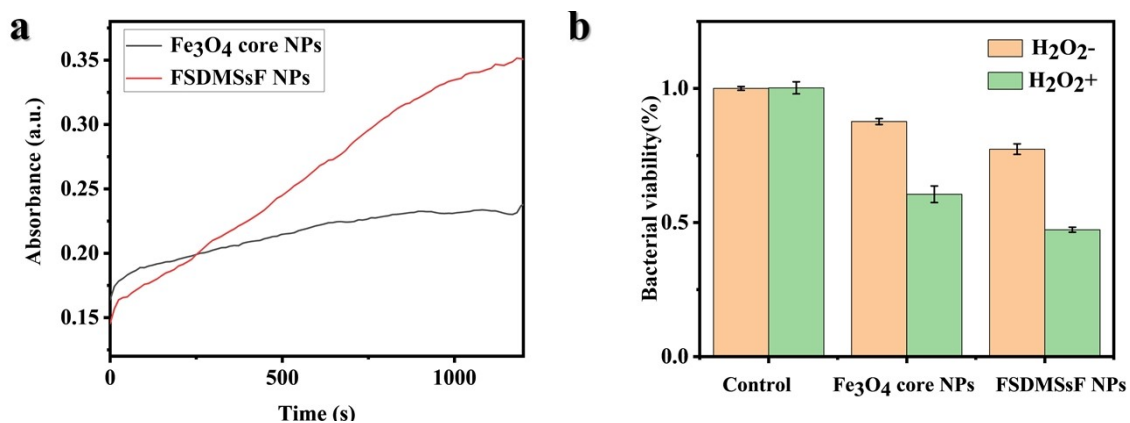

**Figure S10.** Comparison of catalytic performance between Fe<sub>3</sub>O<sub>4</sub> core NPs and FSDMSsF NPs: a) Catalytic activity of Fe<sub>3</sub>O<sub>4</sub> core NPs and FSDMSsF NPs (100 μg/ml). b) The relative activity of *E. coli* treated with Fe<sub>3</sub>O<sub>4</sub> core NPs and FSDMSsF NPs. Error bars indicate standard deviation; the number n of parallel experiments is n = 3.

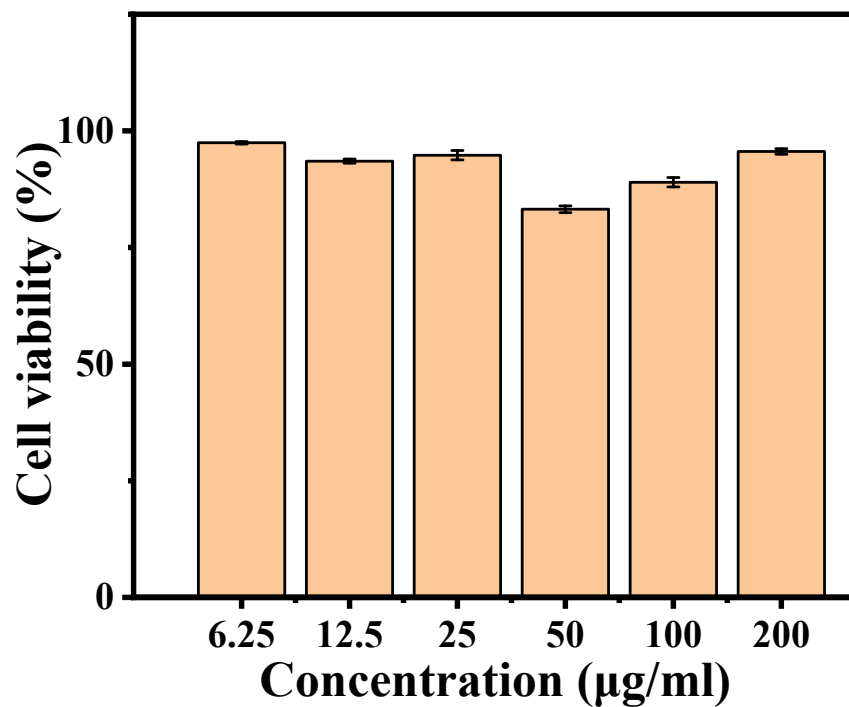

**Figure S11.** Cell viability of HEK-293T cells treated with different concentrations of FSDMSsF NPs solutions. Error bars indicate standard deviation; the number (n) of parallel experiments is n = 3.
